# Supplementary material for: Prospects for detecting early warning signals in discrete event sequence data: Application to epidemiological incidence data
Source: PubMed Central journal article supplement (PMC7531856; doi:10.1371/journal.pcbi.1007836), 2020-09-22
Supplement: pcbi.1007836.s002.pdf [file pcbi.1007836.s002.pdf]

# Table of Indicators

To calculate the statistic at each timepoint of our simulations  $X$ , we first detrend by removing the mean over  $R = 500$  realisations, we name this detrend simulation by  $x$ . We then calculate the statistic over the detrended realisations,

$$\hat{X}(t) = \frac{1}{R} \sum_i^R X_i(t)$$

$$x(t) = X(t) - \hat{X}(t)$$

| EWS                            | Simulation Formula                                                                                                                                     | Theoretical Prediction                                                                                                        |
|--------------------------------|--------------------------------------------------------------------------------------------------------------------------------------------------------|-------------------------------------------------------------------------------------------------------------------------------|
| Variance (V)                   | $\sigma^2(t) = \frac{1}{R} \sum_{i=1}^R x_i(t)^2$                                                                                                      | Section: 1.1, 1.2, 1.3 (Prev, RoI);<br>$V = \Delta t \lambda(t) = \Delta t T(I + 1 I)$ (Inc)                                  |
| Coefficient of Variation (CoV) | $CV(t) = \frac{\sigma(t)}{\hat{X}(t)}$                                                                                                                 | Section: 1.1, 1.2, 1.3 (Prev, RoI);<br>$CV = \frac{1}{\sqrt{\Delta t \lambda(t)}} = \frac{1}{\sqrt{\Delta t T(I+1 I)}}$ (Inc) |
| Skewness                       | $SK(t) = \frac{\frac{1}{R} \sum_{i=1}^R x_i(t)^3}{\sigma^3}$                                                                                           | Zero (Prev, RoI),<br>$SK(t) = \frac{1}{\sqrt{\Delta t \lambda(t)}} = \frac{1}{\sqrt{\Delta t T(I+1 I)}}$                      |
| Excess Kurtosis                | $KT(t) = \frac{\frac{1}{R} \sum_{i=1}^R x_i(t)^4}{\sigma^4} - 3$                                                                                       | Section: 1.1, 1.2, 1.3 (Prev, RoI);<br>$KT(t) = \frac{1}{\Delta t \lambda(t)} = \frac{1}{\Delta t T(I+1 I)}$ (Inc)            |
| Autocorrelation lag-1          | $AC_i(1) = \frac{1}{W} \sum_{t'=t-W/2}^{t+W/2} (x_i(t') - x_{\hat{W}}(t'))(x_i(t'+1) - x_{\hat{W}}(t'))$<br>$AC(1) = \frac{1}{R} \sum_{i=1}^R AC_i(1)$ | Section: 1.1, 1.2, 1.3 (Prev, RoI)                                                                                            |

**Table S1. List of early warning signals.**
