# Supplementary material for: Prospects for detecting early warning signals in discrete event sequence data: Application to epidemiological incidence data
Source: PubMed Central journal article supplement (PMC7531856; doi:10.1371/journal.pcbi.1007836), 2020-09-22
Supplement: pcbi.1007836.s004.pdf [file pcbi.1007836.s004.pdf]

# Approximating incidence by using the rate of the Poisson Process, $\lambda(t) = \Delta t \gamma I$

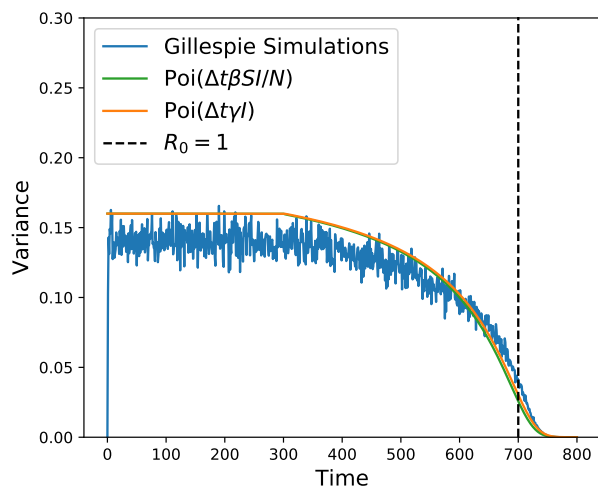

(a) SIS - social distancing (elimination)

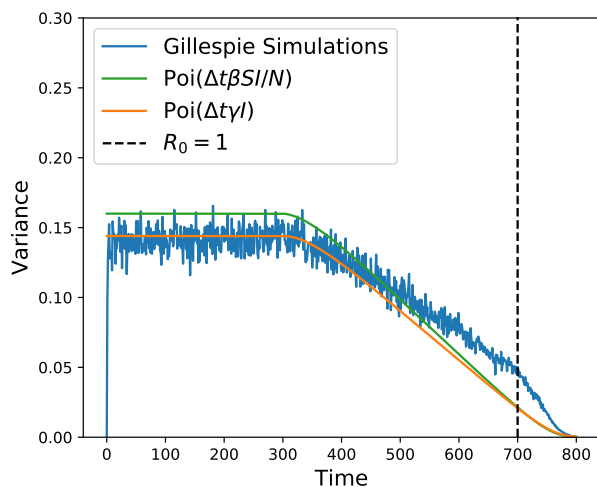

(b) SIS - vaccination (elimination)

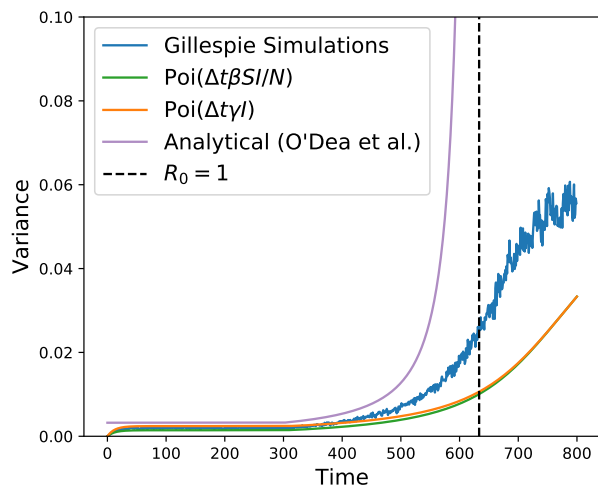

(c) SIS (emergence)

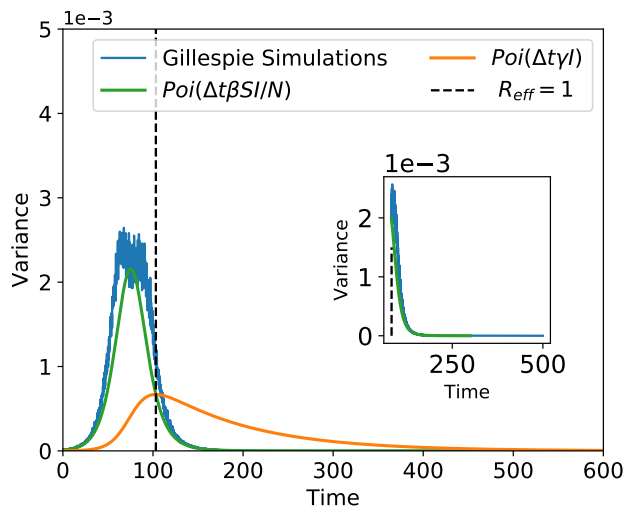

(d) SIR: epidemic curve (emergence and elimination phase)

**Fig. S2. Approximating incidence by using the rate of the Poisson Process,  $\lambda(t) = \Delta t \gamma I$ .** For each model: SIS with social distancing (a), SIS with vaccination (b), SIS increasing transmission/emergence (c) and the SIR epidemic curve (d) we plot two different approximations of the intensity of a Poisson process. The dashed line is the point where  $R_0 = 1$  or  $R_{eff} = 1$  (effective reproduction number - SIR model). Blue line is variance calculated over stochastic simulations. Orange line: Poisson Process with  $\lambda(t) = \gamma I(t)$ . Green line: Poisson Process with  $\lambda(t) = \beta S(t)I(t)$ . Panel (d): SIR epidemic curve, is included here to demonstrate an example where the approximation  $\beta SI/N \approx \gamma I$  isn't appropriate. This is the SIR model with:  $\beta(t) = 0.1$  and  $\gamma = 0.01$
