# Supplementary material for: Prospects for detecting early warning signals in discrete event sequence data: Application to epidemiological incidence data
Source: PubMed Central journal article supplement (PMC7531856; doi:10.1371/journal.pcbi.1007836), 2020-09-22
Supplement: pcbi.1007836.s008.pdf [file pcbi.1007836.s008.pdf]

# Coefficient of Variation

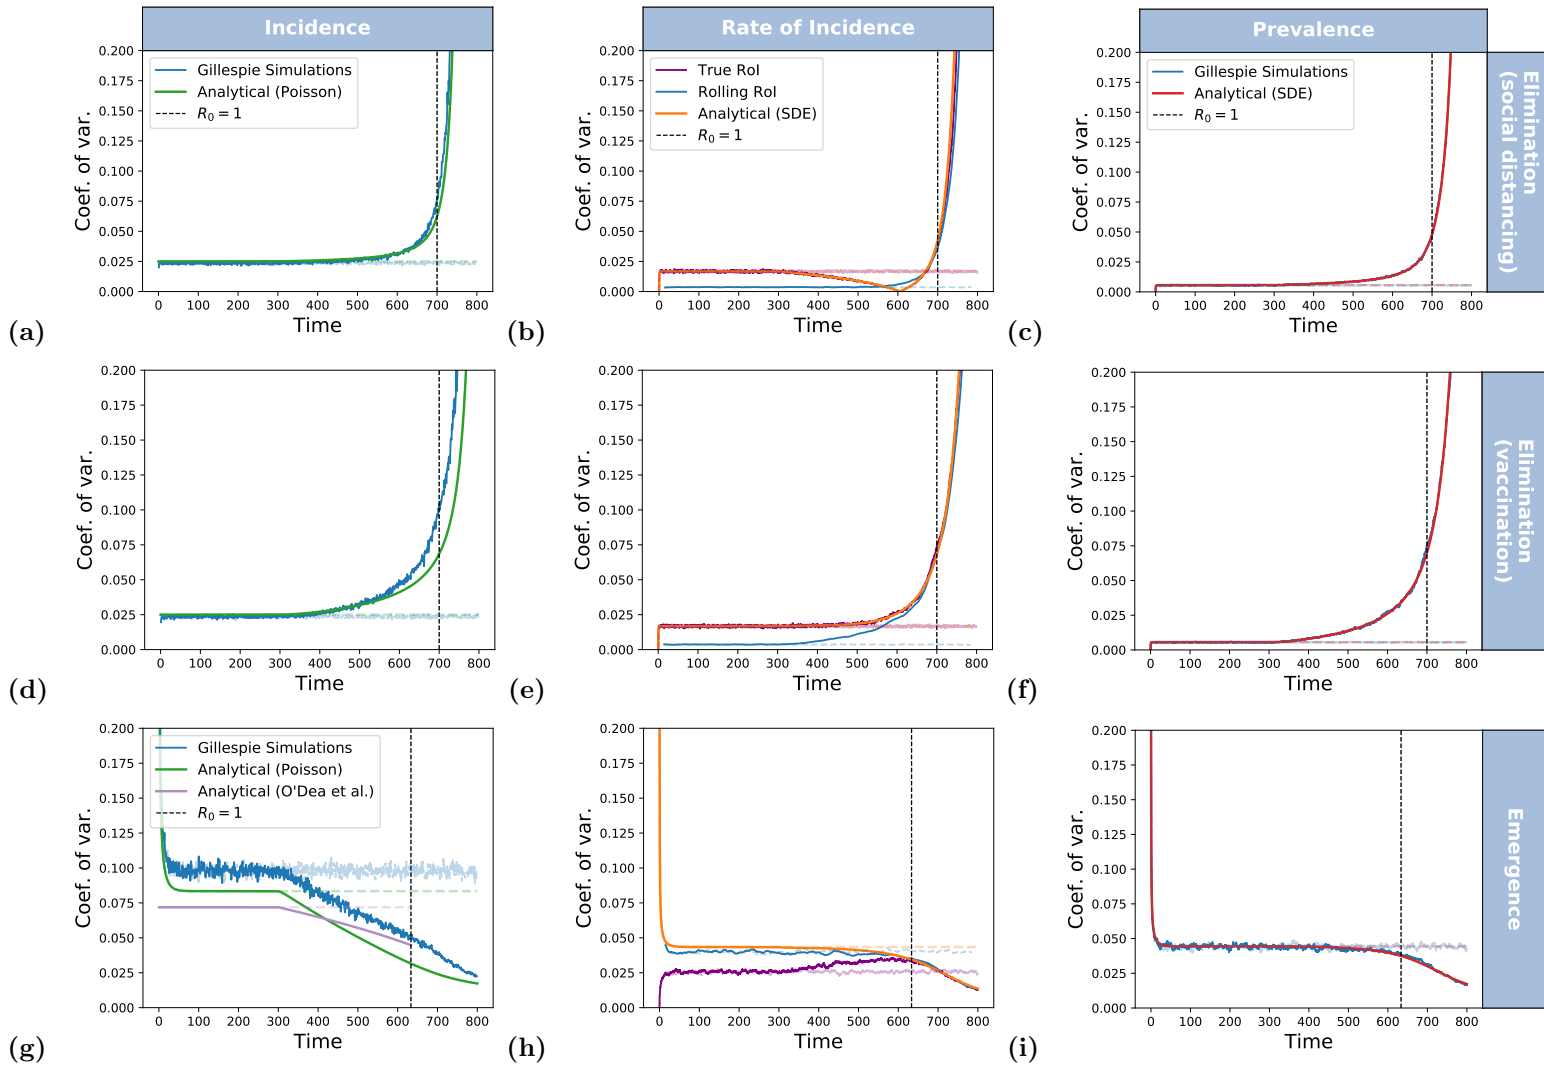

**Fig. S6. Comparing predictions to simulations for Coefficient of Variation** For each model: a, b, c). SIS social distancing (elimination); d,e,f). SIS increasing vaccination (elimination); g,h,i). SIS increasing transmission, (emergence) we calculate the CV between 500 homogeneous realisations at every time step (daily). Each figure shows: Poisson Process distribution (green line); dynamic predictions (red line) and Gillespie simulations (Ext and Emg, blue line).
